# Supplementary material
Source: publisher figshare collection journal article supplement (https://acs.figshare.com/ndownloader/files/4424968)
Supplement: Supplementary file 1 [file 4424968]

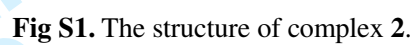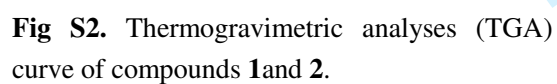

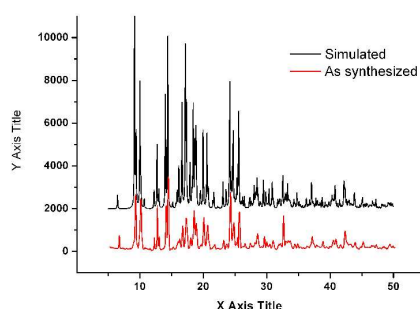

**Fig S3.** Comparison of XRPD patterns of the simulated pattern from the single-crystal structure determination and as-synthesized product of **1**.

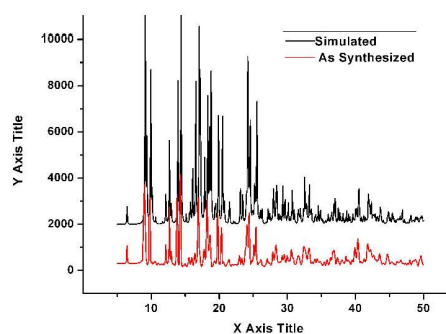

**Fig S4.** Comparison of XRPD patterns of the simulated pattern from the single-crystal structure determination and as-synthesized product of **2**.
